# Supplementary material for: Propagation of Mitochondria-Derived Reactive Oxygen Species within the Dipodascus magnusii Cells
Source: Antioxidants (Basel). 2021 Jan 15;10(1):120. doi: 10.3390/antiox10010120 (PMC7830518; doi:10.3390/antiox10010120)
Supplement: Supplementary file 1 [file antioxidants-10-00120-s001.zip]

Archive with 4 entries (4 files):
- VideoS1.avi
- VideoS2.avi
- VideoS3.avi
- antioxidants-1040177-supplementary.pdf
